# Supplementary material
Source: PubMed Central journal article supplement (PMC7836640)
Supplement: mmc1.pdf [file mmc1.pdf]

**Immunity, Volume 54**

**Supplemental Information**

**The persistence of interleukin-6  
is regulated by a blood buffer system  
derived from dendritic cells**

**Ashraf S. Yousif, Larance Ronsard, Pankaj Shah, Tatsushi Omatsu, Maya Sangesland, Thalia Bracamonte Moreno, Evan C. Lam, Vladimir D. Vrbanac, Alejandro B. Balazs, Hans-Christian Reinecker, and Daniel Lingwood**

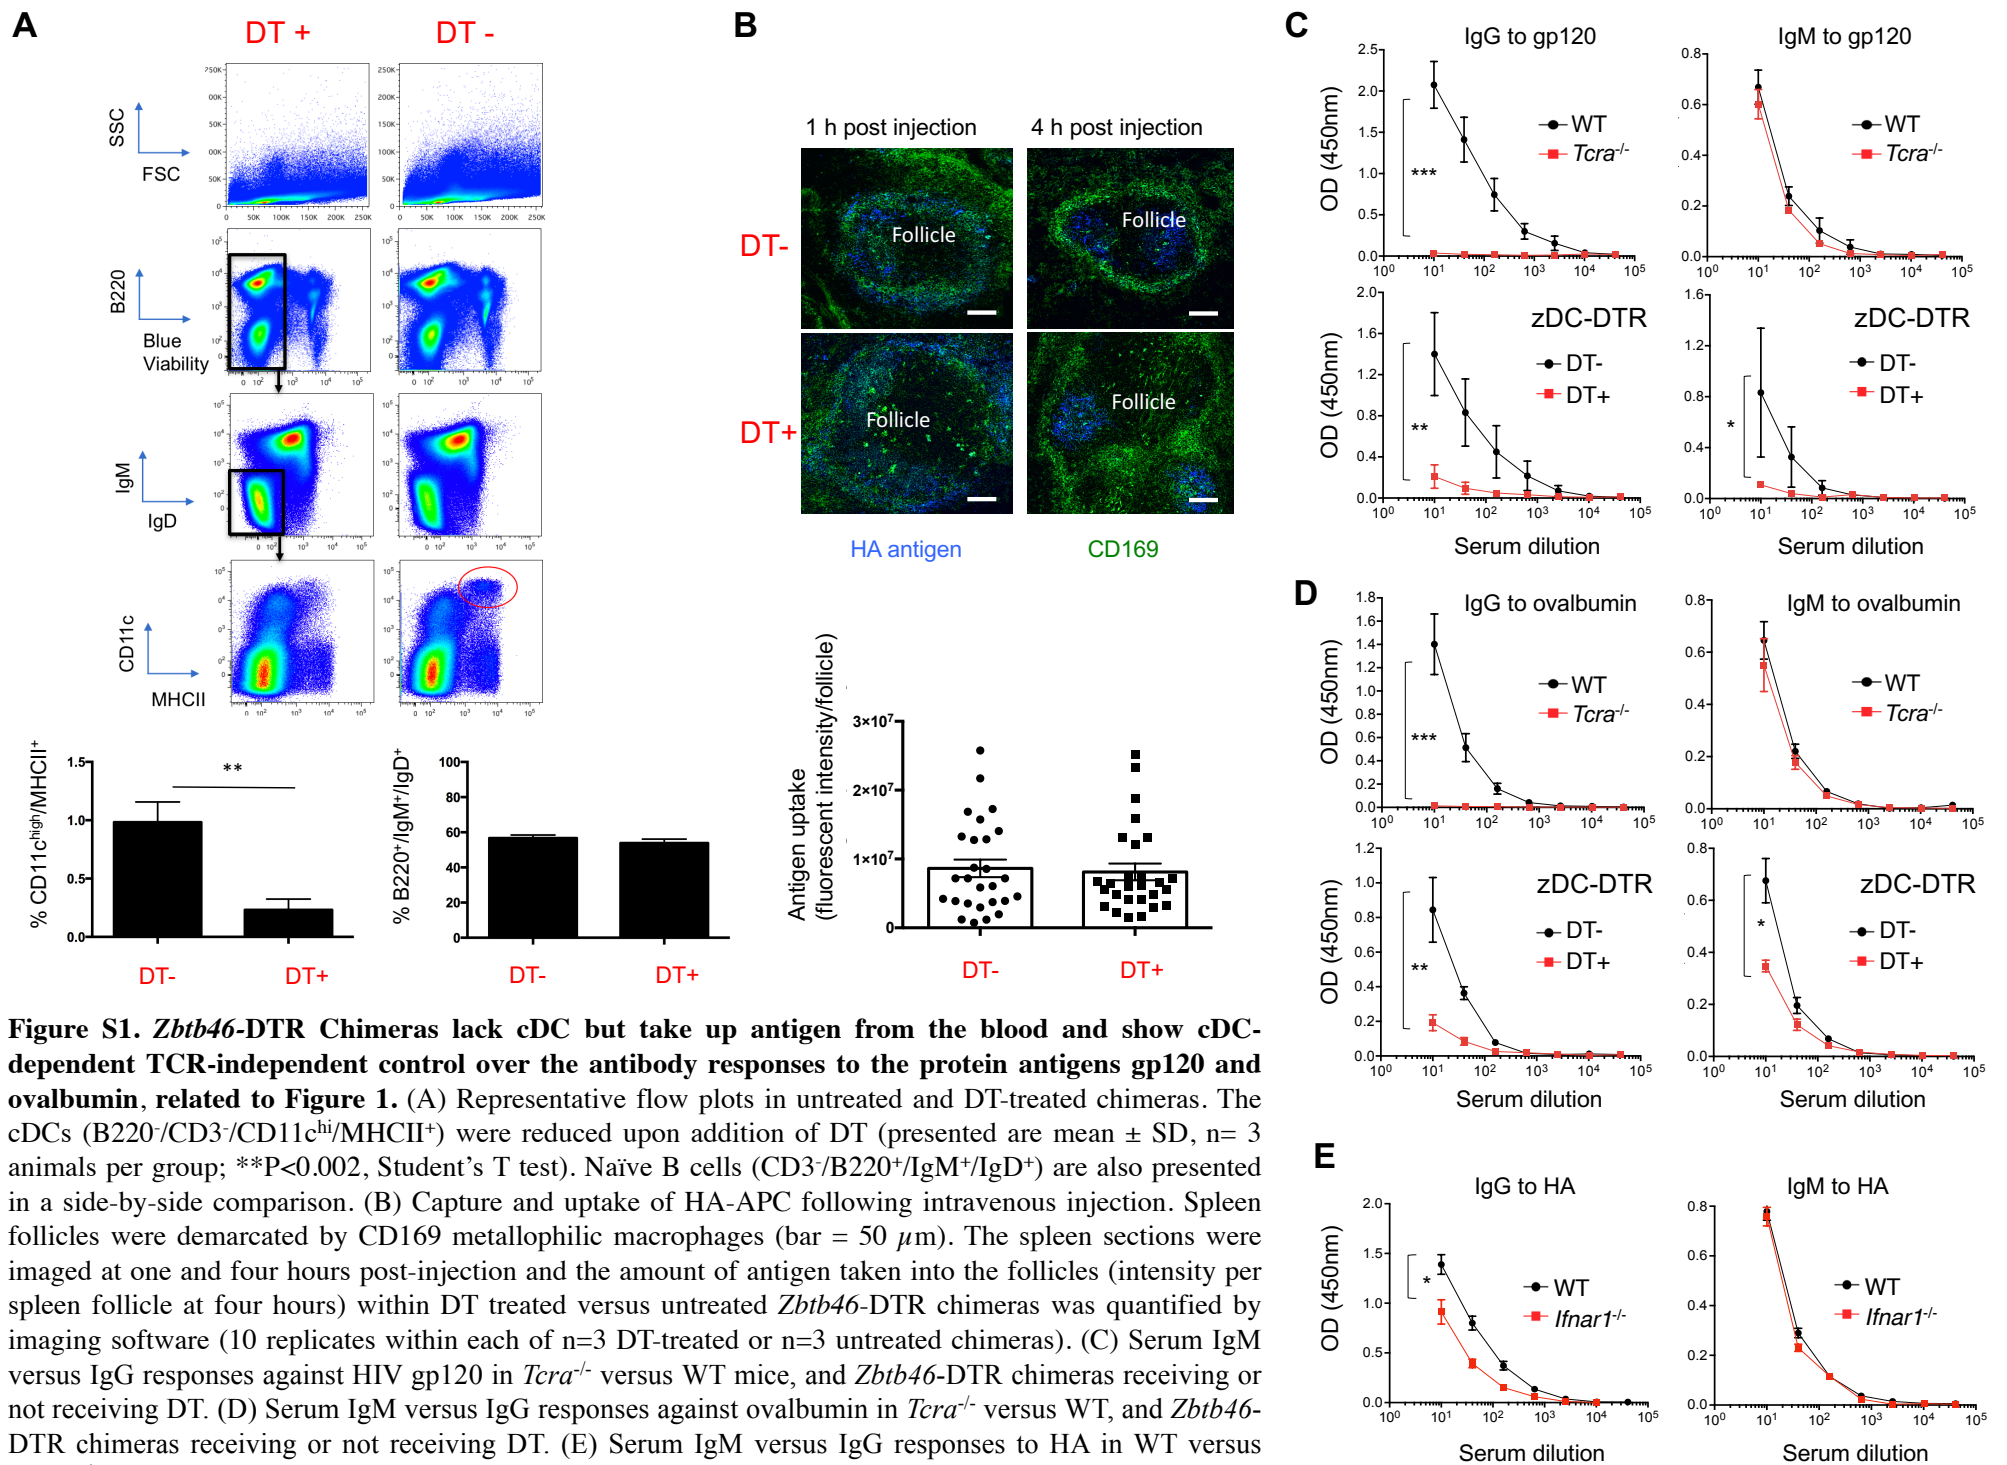

**Figure S1. *Zbtb46*-DTR Chimeras lack cDC but take up antigen from the blood and show cDC-dependent TCR-independent control over the antibody responses to the protein antigens gp120 and ovalbumin, related to Figure 1.** (A) Representative flow plots in untreated and DT-treated chimera mice. The cDCs (B220<sup>-</sup>/CD3<sup>-</sup>/CD11c<sup>hi</sup>/MHCII<sup>+</sup>) were reduced upon addition of DT (presented are mean  $\pm$  SD,  $n=3$  animals per group;  $**P<0.002$ , Student's T test). Naïve B cells (CD3<sup>+</sup>/B220<sup>+</sup>/IgM<sup>+</sup>/IgD<sup>+</sup>) are also presented in a side-by-side comparison. (B) Capture and uptake of HA-APC following intravenous injection. Spleen follicles were demarcated by CD169 metallophilic macrophages (bar = 50  $\mu$ m). The spleen sections were imaged at one and four hours post-injection and the amount of antigen taken into the follicles (intensity per spleen follicle at four hours) within DT treated versus untreated *Zbtb46*-DTR chimera mice was quantified by imaging software (10 replicates within each of  $n=3$  DT-treated or  $n=3$  untreated chimera mice). (C) Serum IgM versus IgG responses against HIV gp120 in *Tcra*<sup>-/-</sup> versus WT mice, and *Zbtb46*-DTR chimera mice receiving or not receiving DT. (D) Serum IgM versus IgG responses against ovalbumin in *Tcra*<sup>-/-</sup> versus WT, and *Zbtb46*-DTR chimera mice receiving or not receiving DT. (E) Serum IgM versus IgG responses to HA in WT versus *Ifnar1*<sup>-/-</sup> mice. The dilution curves (presented as mean  $\pm$  SD,  $n=5$  animals per group), were quantified by endpoint dilution ( $*P<0.02$ ,  $**P<0.03$ ,  $***P<0.0001$ , Student's T test).

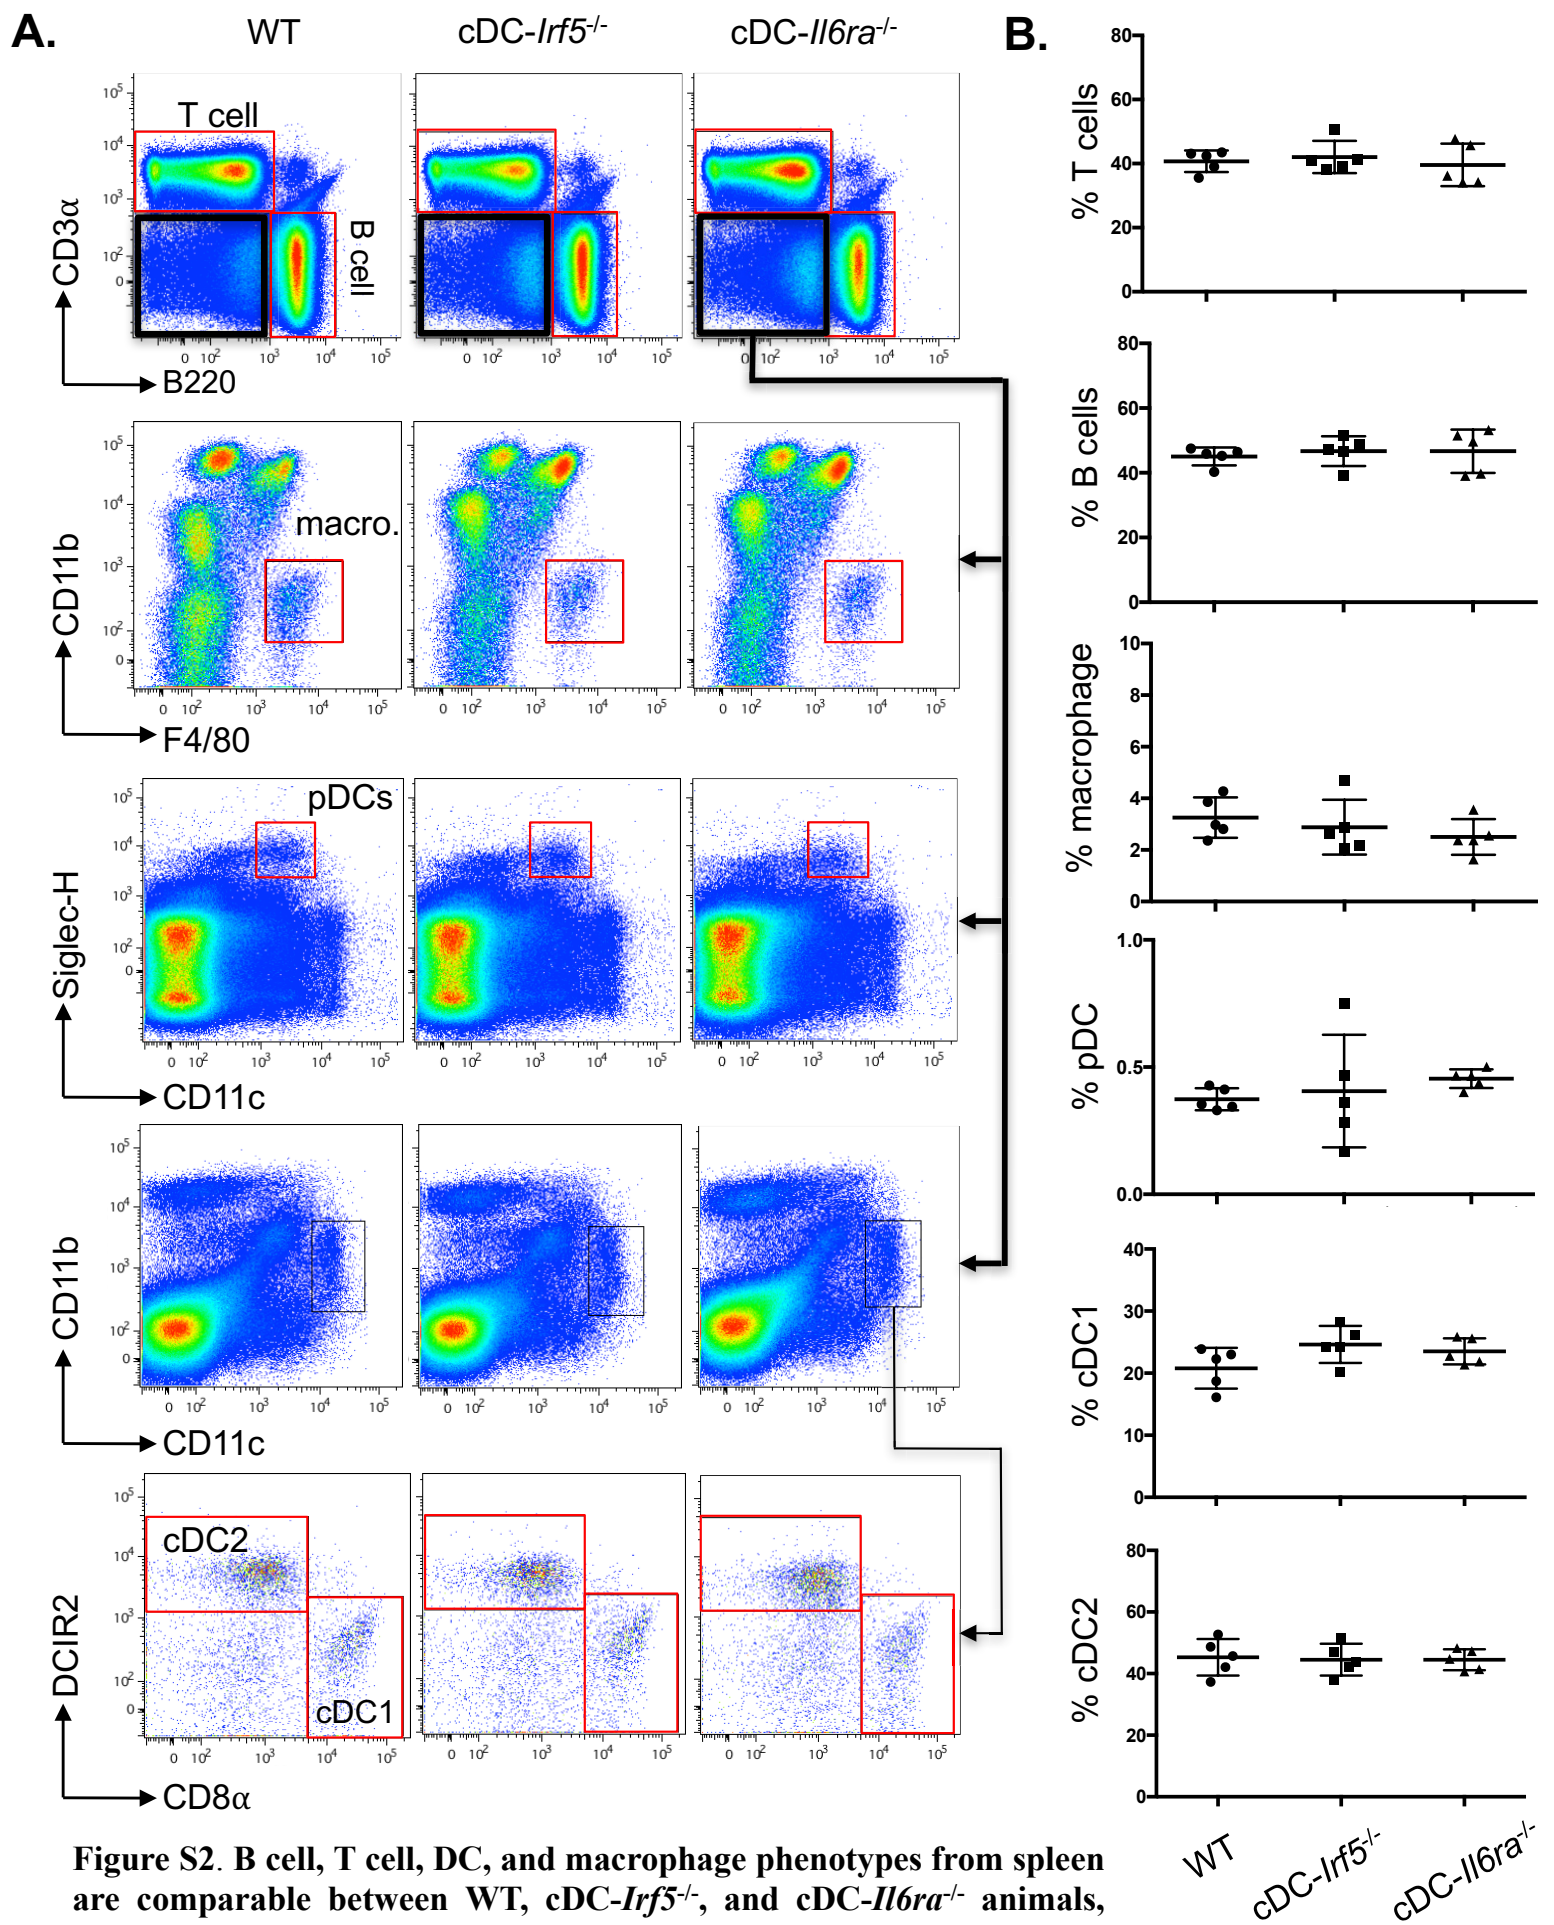

**Figure S2. B cell, T cell, DC, and macrophage phenotypes from spleen are comparable between WT, *cDC-*Irf5*<sup>-/-</sup>*, and *cDC-*Il6ra*<sup>-/-</sup>* animals, related to Figure 2. Their representative flow plots and gating schemes are presented along with a corresponding quantification of proportions of these immune cell types (mean  $\pm$  SD,  $n=5$  animals per genotype).**

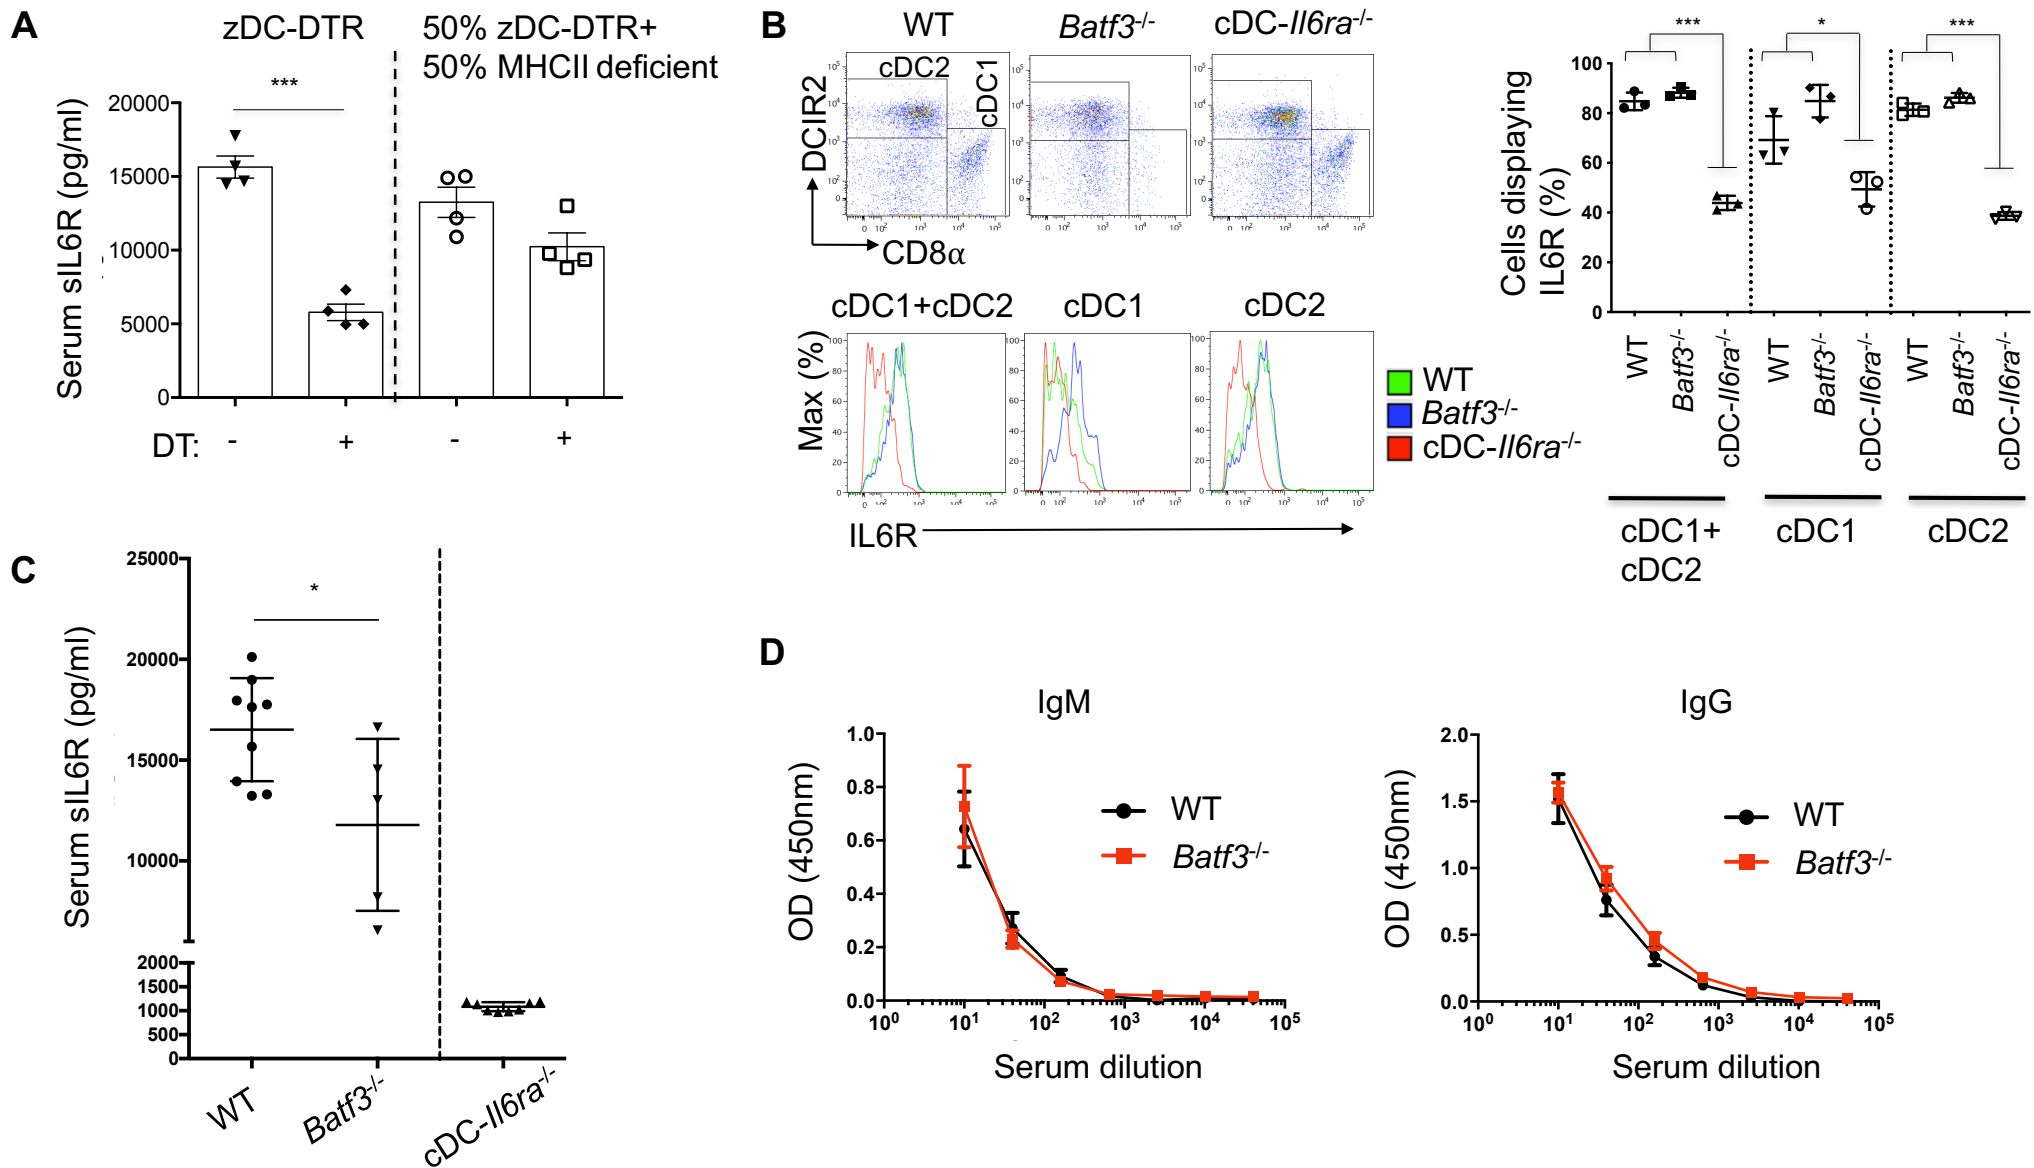

**Figure S3. IL6R measured in bone marrow chimeras and in *Batf3*<sup>-/-</sup> mice, related to Figure 2.** (A) Concentration of circulating sIL6R in 100% *Zbtb46*-DTR chimeras or 50% *Zbtb46*-DTR +50% MHCII deficient (homozygous *H2<sup>dlAb1-Ea</sup>*), each ± DT. Presented is the mean ± SD where \*\*\**P*<0.001, Student's T-test. (B) Surface expression of IL6R in cDC1 and cDC2 within WT, *Batf3*<sup>-/-</sup> (in which cDC1 is largely absent), and *cDC-Il6ra*<sup>-/-</sup> (\**P*<0.05, \*\*\**P*<0.001, ANOVA with Tukey's Test). Total cDC is made up by 27.7 ± 2.54% cDC1 and 72.0 ± 2.50% cDC2 (see also Figure S2). (C) Serum sIL6R was measured in WT, *Batf3*<sup>-/-</sup>, and *cDC-Il6ra*<sup>-/-</sup> genotypes (mean ± SD where \**P*<0.05, Student's T test). (D) The modest reduction in serum sIL6R seen in the *Batf3*<sup>-/-</sup> genotype does not impact IgM or IgG responses to HA, as measured in WT vs *Batf3*<sup>-/-</sup> mice.

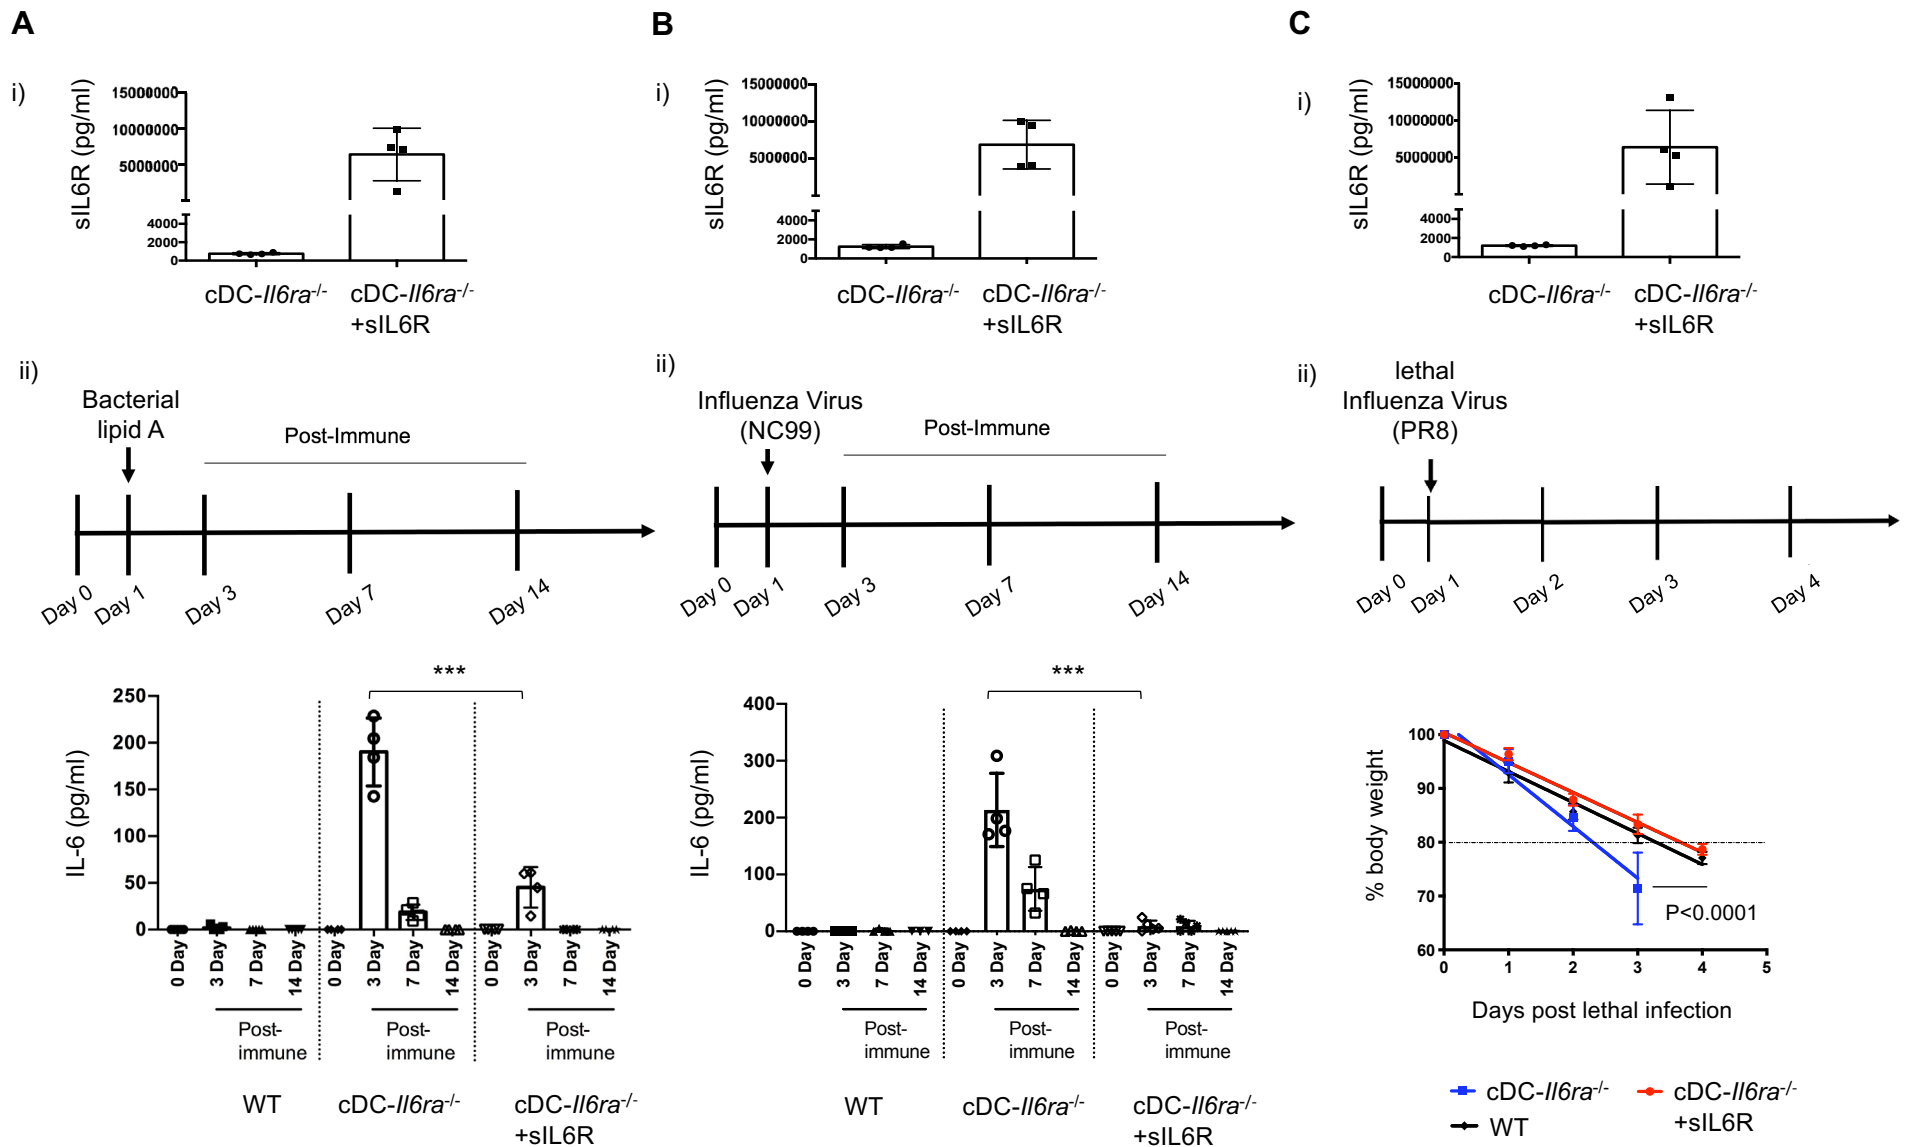

**Figure S4. Addition of sIL6R can rescue dysregulated IL-6 capture in vivo, related to Figure 4.** (Ai, Bi, Ci) sIL6R concentration in cDC-*Il6ra*<sup>-/-</sup> versus mice of the same genotype that received AAV-sIL6R (three weeks post delivery). (Aii) Animals were then injected with intravenously with bacterial lipid A to promote IL-6 release. The circulating concentration of IL-6 was measured at days 3, 7 and 14 (\*\*\*)P<0.001, ANOVA, with Tukey's Test). (Bii) Animals were infected with NC99 influenza virus to promote IL-6 release. The circulating concentration of IL-6 was measured at days 3, 7 and 14 (\*\*\*)P<0.001, ANOVA, with Tukey's Test). NC99 infects and propagates within mice but does not cause disease. (Cii) Animals were challenged with a lethal dose of PR8 influenza virus and morbidly was indexed by measuring weight loss over the next four days. The rate of decline (slope) was compared using F Tests. If body weights were 80% or less (horizontal bar) the mice were euthanized.
